# Supplementary material for: Targeting Sporadic and Neurofibromatosis Type 1 (NF1) Related Refractory Malignant Peripheral Nerve Sheath Tumors (MPNST) in a Phase II Study of Everolimus in Combination with Bevacizumab (SARC016)
Source: Hindawi journal article supplement (doi:10.1155/2019/7656747), 2019-07-24
Supplement: f1 [file 7656747.f1.pdf]

SARC016 Manuscript: Supplementary Data Table

| Adverse events | Related adverse events |         |         |         |         | All adverse events |         |         |         |         |
|----------------|------------------------|---------|---------|---------|---------|--------------------|---------|---------|---------|---------|
|                | Grade 1                | Grade 2 | Grade 3 | Grade 4 | Grade 5 | Grade 1            | Grade 2 | Grade 3 | Grade 4 | Grade 5 |
| Hypertension   | 3 (12)                 | 2 (8)   | 1 (4)   |         |         | 3 (12)             | 2 (8)   | 1 (4)   |         |         |
